# Supplementary material for: Challenges and recommendations to improve the installability and archival stability of omics computational tools
Source: PubMed Central journal article supplement (PMC6605654; doi:10.1371/journal.pbio.3000333), 2019-06-20
Supplement: pbio.3000333.s001.pdf [file pbio.3000333.s001.pdf]

**Supplemental Note 1.** An example of the 'Quick Start'

1. Download the tool using: git clone <https://github.com/x/software.tool.git>
2. Install tool using: cd software.tool; ./install.sh
3. Run the tool for the example dataset (distributed with the tool): ./software.tool  
example.dataset
