# Supplementary material for: Challenges and recommendations to improve the installability and archival stability of omics computational tools
Source: PubMed Central journal article supplement (PMC6605654; doi:10.1371/journal.pbio.3000333), 2019-06-20
Supplement: pbio.3000333.s003.pdf [file pbio.3000333.s003.pdf]

**Supplementary Note 3.** List of bioinformatics tools with name Prism.

- <https://www.ncbi.nlm.nih.gov/pubmed/22851530> (Structural Variance)
- <https://academic.oup.com/nar/article/43/20/9645/1394603> (Metabolomics)
- <https://www.ncbi.nlm.nih.gov/pubmed/21068001> (Viral Genomics)
- <http://honig.c2b2.columbia.edu/prism/> (Protein Structure Analysis)
- <https://www.ncbi.nlm.nih.gov/pubmed/15991339> (Protein Structure)
- <https://www.bits.vib.be/software-overview/graphpad-prism> (Statistics and visualization)
